# Supplementary material for: Feasibility of a Mobile Phone App to Promote Adherence to a Heart-Healthy Lifestyle: Single-Arm Study
Source: PubMed Central journal article supplement (PMC6528433; doi:10.2196/12679), 2019-04-19
Supplement: formative_v3i2e12679_app2.pdf [file formative_v3i2e12679_app2.pdf]

Multimedia Appendix 2. Distribution of scores in COOP-WONCA at baseline (pre) and after 12 weeks (post), numbers presented in percent (%).

|                          | <b>No impariments</b> |      | <b>Slightly a little</b> |      | <b>Moderate</b>       |      | <b>Quite a bit</b>    |      | <b>Extremely</b>  |      |
|--------------------------|-----------------------|------|--------------------------|------|-----------------------|------|-----------------------|------|-------------------|------|
|                          | Pre                   | Post | Pre                      | Post | Pre                   | Post | Pre                   | Post | Pre               | Post |
| <b>Physical fitness</b>  | 36                    | 43   | 14                       | 21   | 43                    | 36   | 7                     |      |                   |      |
| <b>Feelings</b>          | 36                    | 50   | 36                       | 29   | 21                    | 14   | 7                     | 7    |                   |      |
| <b>Daily activities</b>  | 43                    | 50   | 50                       | 29   |                       | 14   | 7                     | 7    |                   |      |
| <b>Social activities</b> | 50                    | 50   | 29                       | 43   | 14                    | 7    | 7                     |      |                   |      |
|                          | <b>Much better</b>    |      | <b>A little better</b>   |      | <b>About the same</b> |      | <b>A little worse</b> |      | <b>Much worse</b> |      |
| <b>Change in health</b>  | 21                    | 14   | 36                       | 29   | 36                    | 50   |                       | 7    | 7                 |      |
|                          | <b>Very good</b>      |      | <b>Good</b>              |      | <b>Fair</b>           |      | <b>Poor</b>           |      | <b>Very poor</b>  |      |
| <b>Overall health</b>    | 7                     | 21   | 58                       | 51   | 21                    | 21   | 14                    | 7    |                   |      |
